# Supplementary material for: Comparison of PET imaging with a 68Ga-labelled PSMA ligand and 18F-choline-based PET/CT for the diagnosis of recurrent prostate cancer
Source: Springer Nature journal article supplement (doi:10.1007/s00259-013-2525-5), 2013-09-26
Supplement: MOESM1 [file 8218658]

## Supplementary Data

**Table 2** Comparison of uptake and contrast in  $^{68}\text{Ga}$ -PSMA-PET/CT and  $^{18}\text{F}$ -fluoromethylcholine-PET/CT

| SUV <sub>max</sub> in tumor suspicious lesions                                         | significantly higher SUV <sub>max</sub> in $^{68}\text{Ga}$ -PSMA-PET/CT | significantly higher SUV <sub>max</sub> in $^{18}\text{F}$ -fluorocholine-PET/CT | without significant difference between $^{68}\text{Ga}$ -PSMA-PET/CT and $^{18}\text{F}$ -fluorocholine-PET/CT |
|----------------------------------------------------------------------------------------|--------------------------------------------------------------------------|----------------------------------------------------------------------------------|----------------------------------------------------------------------------------------------------------------|
| Lymph node metastases (n=40)                                                           | n=38 (95%)                                                               | n=1 (2.5%)                                                                       | n=1 (2.5%)                                                                                                     |
| Bone metastases (n=23)                                                                 | n=17 (73.9%)                                                             | n=6 (26.1%)                                                                      | n=0                                                                                                            |
| Local relapses (n=10)                                                                  | n=6 (60%)                                                                | n=2 (20%)                                                                        | n=2 (20%)                                                                                                      |
| Soft tissue metastases (n=5)                                                           | n=2 (40%)                                                                | n=3 (60%)                                                                        | n=0                                                                                                            |
| Ratio between SUV <sub>max</sub> of tumor lesions and SUV <sub>max</sub> of background | significantly higher ratio in $^{68}\text{Ga}$ -PSMA-PET/CT              | significantly higher ratio in $^{18}\text{F}$ -fluorocholine-PET/CT              | without significant difference between $^{68}\text{Ga}$ -PSMA-PET/CT and $^{18}\text{F}$ -fluorocholine-PET/CT |
| Lymph node metastases (n=40)                                                           | n=40 (100%)                                                              | n=0                                                                              | n=0                                                                                                            |
| Bone metastases (n=23)                                                                 | n=21 (91.3%)                                                             | n=2 (8.7)                                                                        | n=0                                                                                                            |
| Local relapses (n=10)                                                                  | n=9 (90%)                                                                | n=0                                                                              | n=1 (10%)                                                                                                      |
| Soft tissue metastases (n=5)                                                           | n=3 (60%)                                                                | n=0                                                                              | n=2 (40%)                                                                                                      |
