# Supplementary material for: Comparison of PET imaging with a 68Ga-labelled PSMA ligand and 18F-choline-based PET/CT for the diagnosis of recurrent prostate cancer
Source: Springer Nature journal article supplement (doi:10.1007/s00259-013-2525-5), 2013-09-26
Supplement: MOESM2 [file 8218658]

**Table 3** Characteristics of different types of metastases

| <b>SUV<sub>max</sub> in tumor suspicious lesions</b> | <b>average SUV<sub>max</sub><br/>(± SD) of<br/>Choline</b> | <b>average<br/>SUV<sub>max</sub> (± SD)<br/>of PSMA</b> | <b>minimum<br/>(Choline)</b> | <b>minimum<br/>(PSMA)</b> | <b>maximum<br/>(Choline)</b> | <b>maximum<br/>(PSMA)</b> | <b>median<br/>(Choline)</b> | <b>median<br/>(PSMA)</b> |
|------------------------------------------------------|------------------------------------------------------------|---------------------------------------------------------|------------------------------|---------------------------|------------------------------|---------------------------|-----------------------------|--------------------------|
| Lymph node metastases (n=40)                         | 2.8 (± 2.0)                                                | 16.2 (± 18.9)                                           | 0.7                          | 2.0                       | 8.6                          | 100.0                     | 2.1                         | 7.7                      |
| Bone metastases (n=23)                               | 6.1 (± 2.6)                                                | 9.2 (± 3.8)                                             | 2.9                          | 2.1                       | 15.5                         | 16.3                      | 5.8                         | 10.6                     |
| Local relapses (n=10)                                | 4.3 (± 1.2)                                                | 5.4 (± 2.9)                                             | 2.6                          | 2.2                       | 5.8                          | 10.5                      | 4.3                         | 3.8                      |
| Soft tissue metastases (n=5)                         | 5.2 (± 3.2)                                                | 5.4 (± 5.9)                                             | 2.6                          | 0.7                       | 11.3                         | 16.9                      | 4.0                         | 3.1                      |

  

| <b>Ratio between SUV<sub>max</sub> of tumor<br/>lesions and SUV<sub>max</sub> of background</b> | <b>average ratio<br/>(± SD) of<br/>Choline</b> | <b>average ratio<br/>(± SD) of<br/>PSMA</b> | <b>minimum<br/>(Choline)</b> | <b>minimum<br/>(PSMA)</b> | <b>maximum<br/>(Choline)</b> | <b>maximum<br/>(PSMA)</b> | <b>median<br/>(Choline)</b> | <b>median<br/>(PSMA)</b> |
|-------------------------------------------------------------------------------------------------|------------------------------------------------|---------------------------------------------|------------------------------|---------------------------|------------------------------|---------------------------|-----------------------------|--------------------------|
| Lymph node metastases (n=40)                                                                    | 2.6 (± 1.9)                                    | 31.5 (± 33.3)                               | 0.6                          | 4.0                       | 7.4                          | 142.9                     | 1.9                         | 17.3                     |
| Bone metastases (n=23)                                                                          | 3.3 (± 2.1)                                    | 13.6 (± 11.7)                               | 1.1                          | 1.8                       | 8.9                          | 40.8                      | 3.0                         | 8.4                      |
| Local relapses (n=10)                                                                           | 4.1 (± 1.6)                                    | 11.5 (± 7.5)                                | 2.2                          | 4.4                       | 7.3                          | 26.3                      | 3.7                         | 8.8                      |
| Soft tissue metastases (n=5)                                                                    | 3.5 (± 2.4)                                    | 8.8 (± 11.3)                                | 0.9                          | 1.0                       | 7.7                          | 31.0                      | 3.6                         | 2.6                      |

Average SUV<sub>max</sub> of different lesions and their ratio to background including standard deviation, minimum, maximum and median.
