# Supplementary material for: Comparison of PET imaging with a 68Ga-labelled PSMA ligand and 18F-choline-based PET/CT for the diagnosis of recurrent prostate cancer
Source: Springer Nature journal article supplement (doi:10.1007/s00259-013-2525-5), 2013-09-26
Supplement: MOESM3 [file 8218658]

**Table 4** Characteristics of different types of metastases

| Patients                                        | initial GSC      | Dosage (MBq)        | PSA (ng/ml)        |
|-------------------------------------------------|------------------|---------------------|--------------------|
| with path. findings in choline-PET/CT (n=26)    | 7.2 ( $\pm$ 1.1) | 245.3 ( $\pm$ 61.0) | 14.6 ( $\pm$ 27.9) |
| without path. findings in choline-PET/CT (n=11) | 8 ( $\pm$ 1.0)   | 241.9 ( $\pm$ 40.2) | 2.8 ( $\pm$ 3.9)   |
| with path. findings in PSMA-PET/CT (n=32)       | 7.4 ( $\pm$ 1.1) | 140.6 ( $\pm$ 45.5) | 12.5 ( $\pm$ 25.6) |
| without path. findings in PSMA-PET/CT (n=5)     | 7.8 ( $\pm$ 1.0) | 133.4 ( $\pm$ 50.3) | 2.0 ( $\pm$ 0.8)   |

1  
2  
3  
4  
5  
6  
7  
8  
9  
10  
11  
12  
13  
14  
15  
16  
17  
18  
19  
20  
21  
22  
23  
24  
25  
26  
27  
28  
29  
30  
31  
32  
33  
34  
35  
36  
37  
38  
39  
40  
41  
42  
43  
44  
45  
46  
47  
48  
49  
50  
51  
52  
53  
54  
55  
56  
57  
58  
59  
60  
61  
62  
63  
64  
65
